# Supplementary material
Source: publisher figshare collection journal article supplement (https://tandf.figshare.com/articles/dataset/_/3784029)
Supplement: Supplementary file 1 [file 2]

**S1 Table:** Table of the yeast strains.

Description of the yeast strains used in this study are listed in this file.

| Strain name    | Parental strain / background | Genotype                                                                                                   | Source           |
|----------------|------------------------------|------------------------------------------------------------------------------------------------------------|------------------|
| Y1264          | W303                         | <i>MATa ade2- 1 ura3-1 his3-11,15 trp1-1 leu2-3,112 can1-100 Rad5+</i>                                     | Lab stock        |
| Y1/<br>Y1126   | JKM179                       | <i>MATalpha ho hml::ADE1 hmr::ADE1 ade1-100 leu2-3, 112 lys5, trp1::hisG ura3-52 lys5::ade3::GAL10::HO</i> | Lee et al., 1998 |
| Y1600/<br>Y117 | JKM139                       | <i>MATa ho hml::ADE1 hmr::ADE1 ade1-100 leu2-3, 112 lys5, trp1::hisG ura3-52 lys5::ade3::GAL10::HO</i>     | Lee et al., 1998 |
| Y152           | Y117                         | <i>CDC5-3HA::KANMX6</i>                                                                                    | This study       |
| Y1465          | Y117                         | <i>cdc5-L251W-3HA::KANMX6</i>                                                                              | This study       |
| Y1466          | Y117                         | <i>cdc5-T238A-3HA::KANMX6</i>                                                                              | This study       |
| Y1573          | Y117                         | <i>cdc5-T238D-3HA::KANMX6</i>                                                                              | This study       |
| Y1398          | Y117                         | <i>cdc5-L251W</i>                                                                                          | This study       |
| Y1777          | Y117                         | <i>cdc5-T238A</i>                                                                                          | This study       |
| Y1908          | Y1126                        | <i>cdc5-T238A-3HA::KANMX6</i>                                                                              | This study       |
| Y1743          | Y1264                        | <i>cdc5-T238A-3HA::KANMX6</i>                                                                              | This study       |
| Y1973          | Y1264                        | <i>BIR induced chromosome – D8B CFV, Left arm Chr III</i>                                                  | This study       |
| Y1979          | Y1642                        | <i>cdc5-T238A<br/>BIR induced chromosome – D8B CFV, Left arm Chr III</i>                                   | This study       |
| Y2371          | Y1493                        | <i>cdc5-L251W-3HA::KANMX6,<br/>BIR induced chromosome – D8B CFV, Left arm Chr III</i>                      | This study       |
| Y2147          | Y1600                        | <i>MMS4-3HA::TRP1</i>                                                                                      | This study       |
| Y2206          | Y2147 X<br>Y1908             | <i>cdc5-T238A-3HA::KANMX6 MMS4-3HA::TRP1</i>                                                               | This study       |
| Y2491          | Y2147 X<br>Y15               | <i>cdc5-L251W-3HA::TRP1, MMS4-3HA::TRP1</i>                                                                | This study       |
| Y15            | Y1                           | <i>cdc5-L251W-3HA::TRP1</i>                                                                                | This Study       |
| Y543           | Y117                         | <i>tel11Δ::KANMX6</i>                                                                                      | This study       |
| Y2155          | Y543 X Y1908                 | <i>cdc5-T238A-3HA::KANMX6 tel11Δ::KANMX6</i>                                                               | This study       |
| Y226           | Y1                           | <i>bfa1Δ::KANMX6</i>                                                                                       | This study       |
| Y3535          | Y226 X Y1466                 | <i>cdc5-T238A-3HA::KANMX6 bfa1Δ::KANMX6</i>                                                                | This study       |
| Y286           | Y117                         | <i>mad2Δ::KANMX6</i>                                                                                       | This study       |
| Y1574          | Y1466 X Y285                 | <i>cdc5-T238A-3HA::KANMX6 mad2Δ::KANMX6</i>                                                                | This study       |
| Y601           | Y117                         | <i>rad9Δ::KANMX6</i>                                                                                       | This study       |
| Y1535          | Y601 X Y1466                 | <i>cdc5-T238A-3HA::KANMX6 rad9Δ::KANMX6</i>                                                                | This study       |
| Y2228          | Y1600                        | <i>CDC5-eGFP::KANMX6</i>                                                                                   | This study       |
| Y2230          | Y1777                        | <i>CDC5-T238A-eGFP::KANMX6</i>                                                                             | This study       |
| Y2232          | Y1398                        | <i>CDC5-L251W-eGFP::KANMX6</i>                                                                             | This study       |
| Y505           | W303                         | <i>cdc5-1</i><br>Kind gift from Marco Muzi-Falconi                                                         | Lab stock.       |

|                   |                  |                                                                                        |                                                           |
|-------------------|------------------|----------------------------------------------------------------------------------------|-----------------------------------------------------------|
| Y1327             | Y505             | <i>cdc5-1 &lt;Ycplac22-TRP-CEN&gt;</i>                                                 | This study                                                |
| Y1329             | Y505             | <i>cdc5-1 &lt;CDC5-HA-TRP-CEN&gt;</i>                                                  | This study                                                |
| Y1331             | Y505             | <i>cdc5-1 &lt;cdc5-N209A-HA-TRP-CEN&gt;</i>                                            | This study                                                |
| Y1333             | Y505             | <i>cdc5-1 &lt;cdc5-T238A-HA-TRP-CEN&gt;</i>                                            | This study                                                |
| Y1461             | Y505             | <i>cdc5-1 &lt;cdc5-T242A-HA-TRP-CEN&gt;</i>                                            | This study                                                |
| Y101C7,<br>Y101C8 | BY4741/42        | <i>MAT a, α, hxt13Δ::URA3 mfa1::MFA1pr-HIS3<br/>his3Δ1 ura3Δ0 lyp1Δ leu2Δ0 met15Δ0</i> | Kind gift from<br>Grant W.<br>Brown, Zhang<br>et al, 2006 |
| Y3359,<br>Y3360   | Y101C7           | <i>cdc5-T238A-3HA::KAN</i>                                                             | This study                                                |
| Y3510,<br>Y3532   | Y101C8           | <i>sgs1Δ::HPH</i>                                                                      | This study                                                |
| Y3529,<br>Y3530   | Y3510 X<br>Y3359 | <i>sgs1Δ::HPH, cdc5-T238A-3HA::KAN</i>                                                 | This study                                                |
| Y1866             | Y1126            | <i>sgs1Δ::HPH</i>                                                                      | This study                                                |
| Y1895             | Y1866 X<br>Y1776 | <i>sgs1Δ::HPH, cdc5-T238A-3HA::KAN</i>                                                 | This study                                                |
| Y1893             | Y1866 X<br>Y1465 | <i>sgs1Δ::HPH, cdc5-L251W-3HA::KAN</i>                                                 | This study                                                |
| Y3536             | Y226 XY1465      | <i>cdc5-L251W-3HA::KANMX6 bfa1Δ::KANMX6</i>                                            | This study                                                |
| Y2441             | W303             | <i>cdc13-1</i> Kind gift from Marco Muzi-Falconi                                       | Lab stock                                                 |
| Y2493             | Y2441 X<br>Y1743 | <i>cdc5-T238A-3HA::KANMX6, cdc13-1</i>                                                 | This study                                                |
| Y2529             | Y2452 X<br>Y1743 | <i>rad9 Δ::HIS3 cdc5-T238A-3HA::KANMX6, cdc13-1</i>                                    | This study                                                |
| Y2452             | Y2441            | <i>rad9 Δ::HIS3, cdc13-1</i> Kind gift from Marco Muzi-Falconi                         | Lab stock                                                 |
| Y1642             | Y1264            | <i>cdc5-T238A</i>                                                                      | This study                                                |
| Y1493             | Y1264            | <i>cdc5-ad</i>                                                                         | This study                                                |
